# Supplementary material
Source: PubMed Central journal article supplement (PMC7705303)
Supplement: supp_RA120.015110_161969_1_supp_588628_qfsd82.pdf [file supp_RA120.015110_161969_1_supp_588628_qfsd82.pdf]

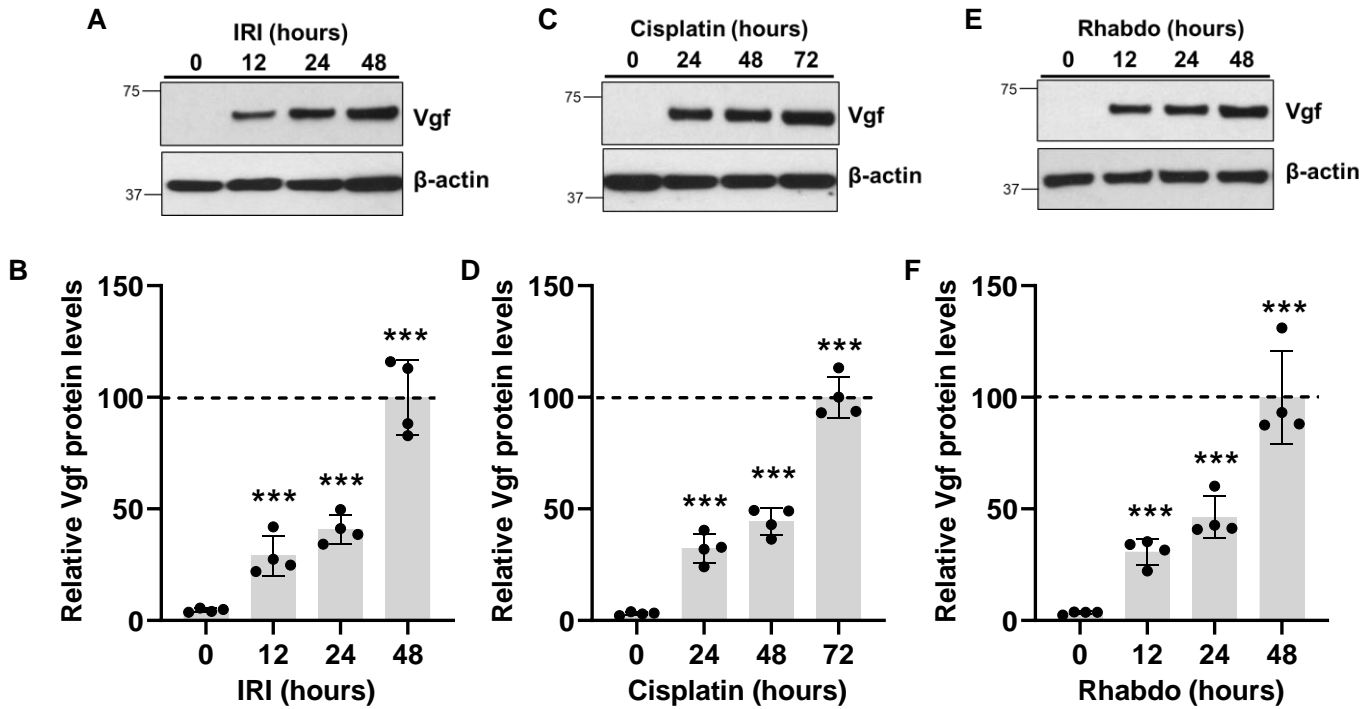

**Supplementary Information Figure S1. Renal Vgf protein induction during AKI.** 8-12 weeks C57BL/6J mice male were challenged with bilateral renal ischemia (30 minutes), cisplatin (30 mg/kg, single intraperitoneal injection) treatment, or glycerol-induced rhabdomyolysis (7.5 ml/kg 50% glycerol in the hind-leg muscles) followed by tissue collection at indicated time-points. Immunoblot analysis showed an early induction of Vgf protein during AKI. The blots (**A**, **C**, and **E**) are representative of three independent experiments. The graphs (**B**, **D**, and **F**) depict densitometric analysis of Vgf protein in renal tissues. In all the bar graphs (n=4 biologically independent samples), experimental values are presented as mean  $\pm$  s.d. The height of error bar = 1 s.d. and  $p < 0.05$  was indicated as statistically significant. 1-way ANOVA followed by Dunnett's multiple-comparisons test was carried out and statistical significance is indicated by \* $p < 0.05$ , \*\* $p < 0.01$ , \*\*\* $p < 0.001$ .

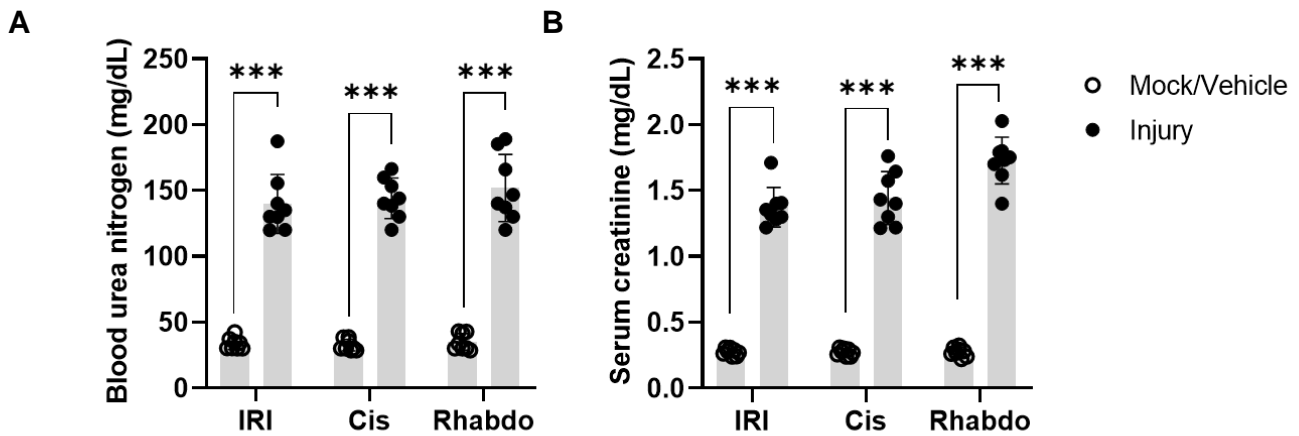

**Supplementary Information Figure S2. Characterization of the RTEC-specific EGFP expressing reporter mice.** Ggt1-Cre mice were crossed with ROSAmT/mG mice to generate transgenic mice that express membrane-localized EGFP in RTECs. 8-12 weeks male mice were then challenged with bilateral renal ischemia (30 minutes), cisplatin (30 mg/kg, single intraperitoneal injection) treatment, or glycerol-induced rhabdomyolysis (7.5 ml/kg 50% glycerol in the hind-leg muscles) followed by examination of renal structure and function. The mock/vehicle groups represent respective control groups (with no injury). (A-B) Representative graphs depicting injury-induced increase in blood urea nitrogen and serum creatinine levels (IRI and Rhabdo at 24 hours and Cisplatin at 72 hours). The graphs (n=8) are representative of three independent experiments. In all the bar graphs, experimental values are presented as mean  $\pm$  s.d. The height of error bar = 1 s.d. and  $p < 0.05$  was indicated as statistically significant. Student's t test was carried out, and statistical significance is indicated by \* $p < 0.05$ , \*\* $p < 0.01$ , \*\*\* $p < 0.001$ .

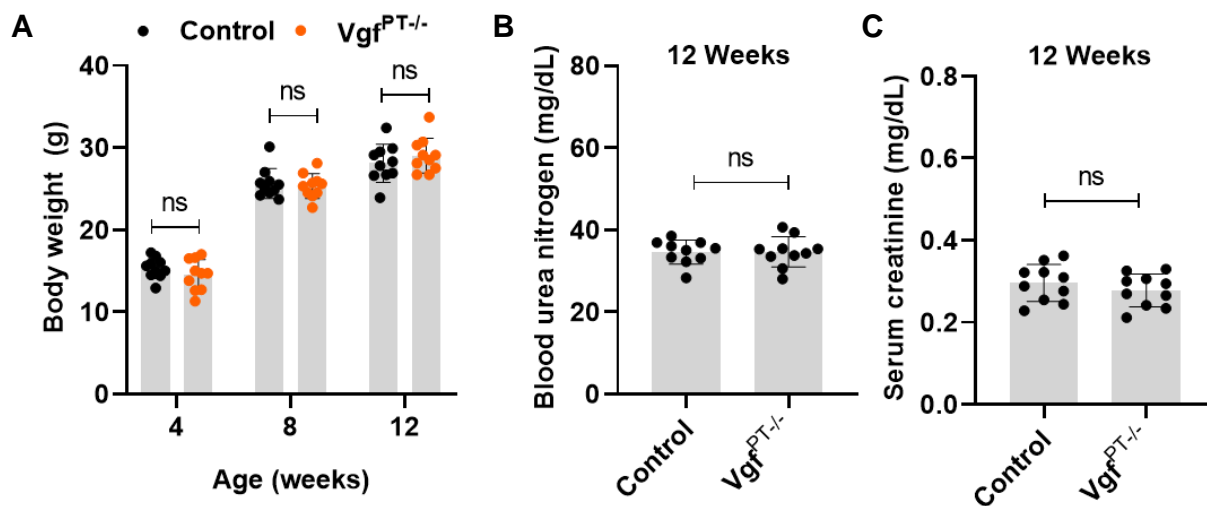

**Supplementary Information Figure S3. Characterization of the RTEC-specific *Vgf* deficient mice.** Ggt1-Cre mice were crossed with *Vgf*-floxed mice to generate RTEC-specific *Vgf* deficient mice. (A) Body weight measurements showed no differences between the control and *Vgf* deficient mice up to 12 weeks of age. (B-C) Renal function (BUN and Creatinine) was examined in littermates with indicated genotypes at 12 weeks of age under baseline conditions. These results show that RTEC-specific *Vgf* knockout does not affect kidney function under normal conditions. Data are presented as individual data points (n = 10), from a single long-term experiment. In all the bar graphs, experimental values are presented as mean  $\pm$  s.d. The height of error bar = 1 s.d. and  $p < 0.05$  was indicated as statistically significant. Student's t test was carried out, and statistical significance is indicated by \* $p < 0.05$ , \*\* $p < 0.01$ , \*\*\* $p < 0.001$ , and ns = not significant.

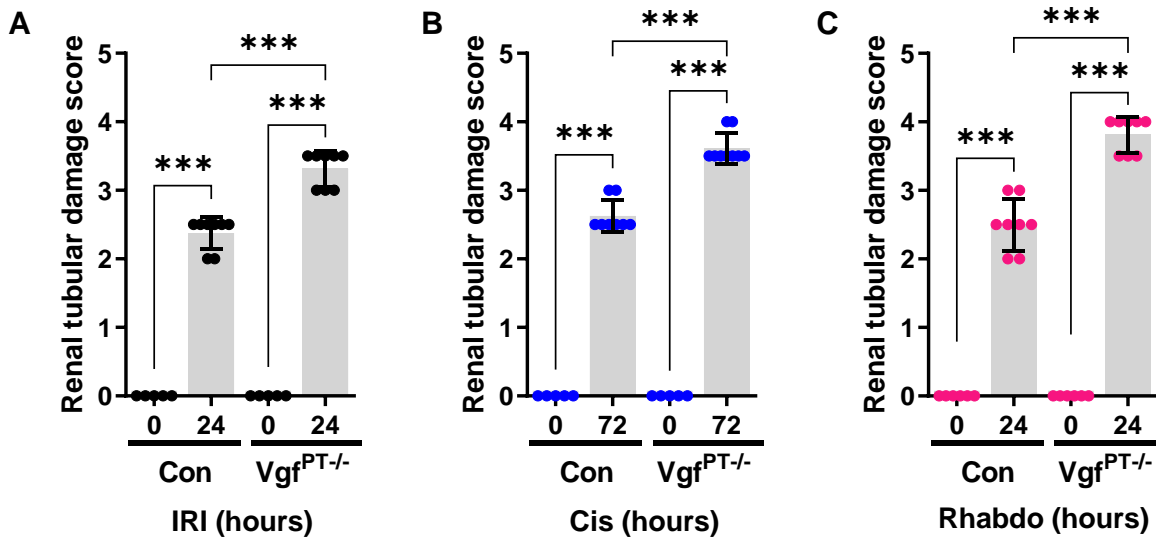

**Supplementary Information Figure S4. Histological analysis shows higher renal damage in Vgf-deficient mice.** 8-12 weeks old littermate control and Vgf conditional knockout male mice (indicated by Vgf<sup>PT-/-</sup>) were challenged with bilateral renal ischemia (30 minutes), cisplatin (30 mg/kg, single intraperitoneal injection) treatment, or glycerol-induced rhabdomyolysis (7.5 ml/kg 50% glycerol in the hind-leg muscles) followed by examination of renal histology by H&E staining. (A-C) Histological analysis showed that Vgf deficiency exacerbates renal damage associated with ischemic, nephrotoxic, and rhabdomyolysis-associated injury. In all the bar graphs (n=8 biologically independent samples), experimental values are presented as mean ± s.d. The height of error bar = 1 s.d. and p < 0.05 was indicated as statistically significant. One-way ANOVA followed by Tukey's multiple-comparison test was carried out, and statistical significance is indicated by \*p < 0.05, \*\*p < 0.01, \*\*\*p < 0.001.

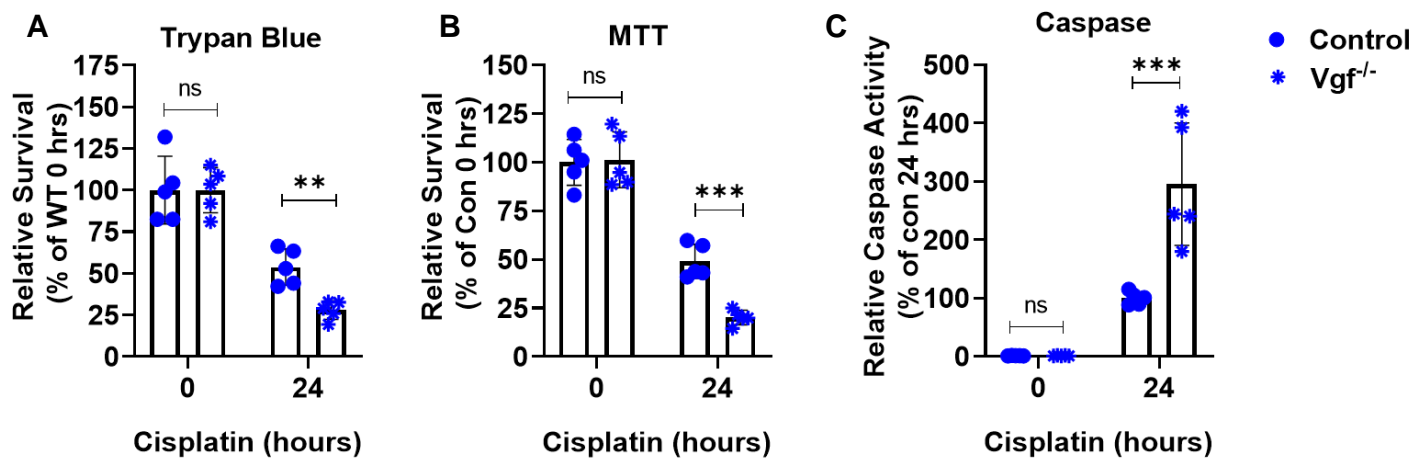

**Supplementary Information Figure S5. *Vgf* deficiency sensitizes RTECs to cisplatin-induced cell death.** Primary RTECs from mice with indicated genotypes were treated with 50  $\mu$ M cisplatin, followed by cell viability assessment using trypan blue staining (A), MTT assay (B), and measurement of caspase activity (C) in cellular lysates. In all the bar graphs (n=8 biologically independent samples), experimental values are presented as mean  $\pm$  s.d. The height of error bar = 1 s.d. and  $p < 0.05$  was indicated as statistically significant. One-way ANOVA followed by Dunnett's was carried out, and statistical significance is indicated by \* $p < 0.05$ , \*\* $p < 0.01$ , \*\*\* $p < 0.001$

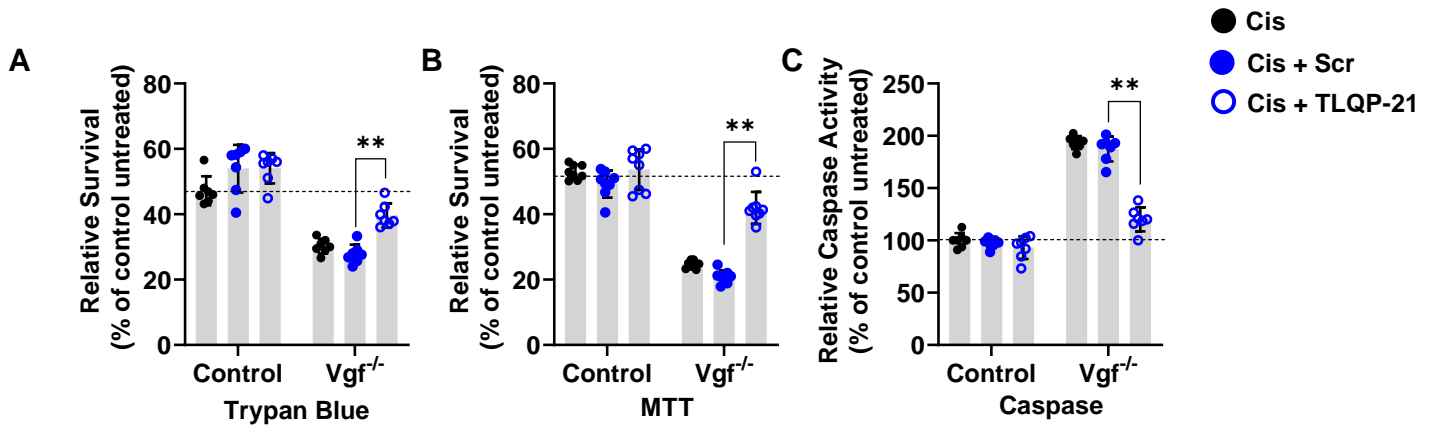

**Supplementary Information Figure S6. TLQP-21 protects Vgf deficient RTECs from cisplatin-induced cell death.**

Primary murine renal tubular cells of indicated genotypes were treated with 50  $\mu$ M cisplatin followed by treatment with 25 nM scrambled peptide or TLQP-21 four hours later. At 24 hours examination of cell viability by trypan blue staining (A), MTT assay (B) and caspase assays (C) showed that TLQP-21 can reverse the hyper-sensitive response of Vgf deficient cells to cisplatin treatment. In all the bar graphs (n=8 biologically independent samples), experimental values are presented as mean  $\pm$  s.d. The height of error bar = 1 s.d. and p < 0.05 was indicated as statistically significant. One-way ANOVA followed by Dunnett's was carried out, and statistical significance is indicated by \*p < 0.05, \*\*p < 0.01, \*\*\*p < 0.001

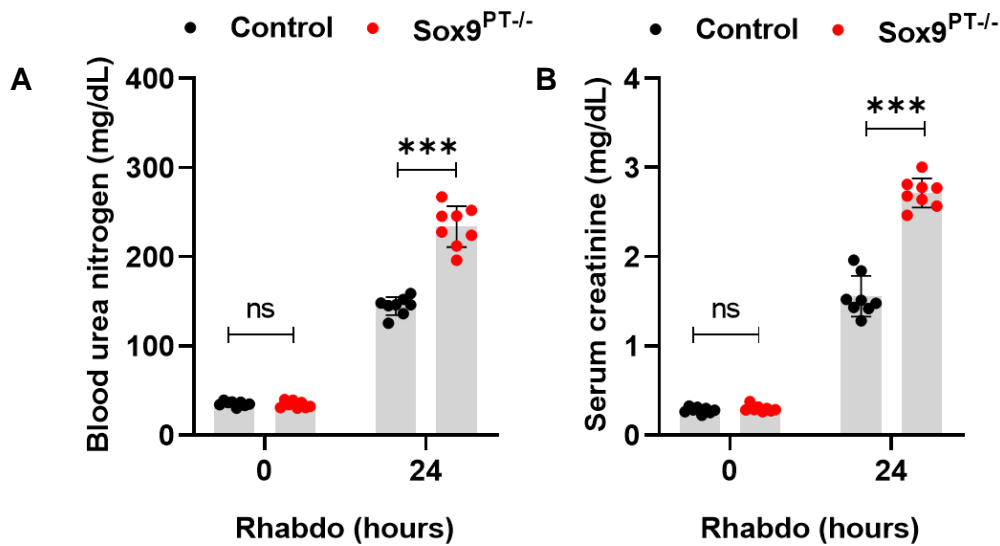

**Supplementary Information Figure S7. Sox9 plays a protective role during Rhabdomyolysis-associated AKI.** To generate mice with renal tubule-specific Sox9 knockout, Ggt1-Cre mice were crossed with Sox9-floxed mice. Control and Sox9<sup>PT-/-</sup> male littermates (8-12 weeks age) were challenged with glycerol-induced rhabdomyolysis (7.5 ml/kg 50% glycerol in the hind-leg muscles) followed by examination of renal impairment. **(A-B)** Blood urea nitrogen and serum creatinine measurements showed that RTEC-specific Sox9 deficiency exacerbates rhabdomyolysis-associated AKI. In all the bar graphs (n=9 biologically independent samples), experimental values are presented as mean  $\pm$  s.d. The height of error bar = 1 s.d. and  $p < 0.05$  was indicated as statistically significant. One-way ANOVA followed by Tukey's multiple-comparison test was carried out, and statistical significance is indicated by \* $p < 0.05$ , \*\* $p < 0.01$ , \*\*\* $p < 0.001$ .

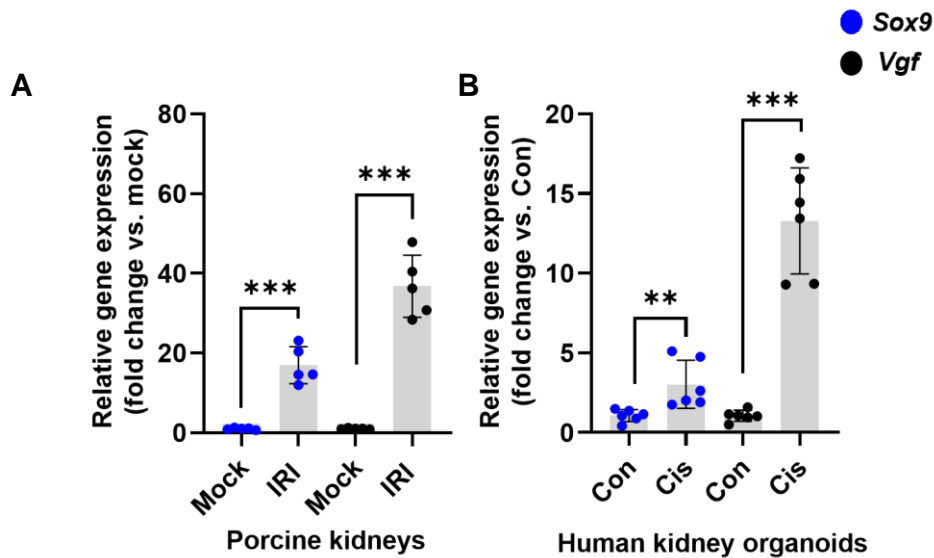

**Supplementary Information Figure S8. *Sox9-Vgf* axis in porcine and human organoid models of kidney injury.** (A) Female pigs (55-65kg) were anaesthetised for general surgery and bilateral renal artery cross-clamping (40min) with 48h post-surgical recovery (IRI). Sham-controls had an equivalent surgical experience but the renal arteries remained patent ('Mock') as described previously (Ref. 42). qPCR based-analysis of renal cortical tissues showed that ischemic injury results in *Sox9* and *Vgf* mRNA upregulation. (B) Pluripotent stem cell-derived human kidney organoids were treated with vehicle (Con) or Cisplatin as described recently (Ref. 43). qPCR examination of renal epithelial cells isolated from human organoids showed that *Sox9* and *Vgf* mRNA is upregulated by cisplatin treatment. In all the bar graphs experimental values are presented as mean  $\pm$  s.d. The height of error bar = 1 s.d. and  $p < 0.05$  was indicated as statistically significant. Student's t-test was carried out, and statistical significance is indicated by \* $p < 0.05$ , \*\* $p < 0.01$ , \*\*\* $p < 0.001$ .
